# Supplementary material for: Combining Gene Signatures Improves Prediction of Breast Cancer Survival
Source: PubMed Central journal article supplement (PMC3053398; doi:10.1371/journal.pone.0017845), 2011-03-10
Supplement: pone.0017845.s007.pdf [file pone.0017845.s007.pdf]

**Table S1. Results summary of PCA on predicted PIs for systemic recurrence from 9 converged gene sets.**

**Standard deviations:**

2.41 1.04 0.85 0.68 0.61 0.49 0.43 0.33 0.15

**Rotation:**

|           | PC1  | PC2   | PC3   | PC4   | PC5   | PC6   | PC7   | PC8   | PC9   |
|-----------|------|-------|-------|-------|-------|-------|-------|-------|-------|
| RS        | 0.32 | -0.46 | 0.18  | 0.02  | 0.18  | -0.55 | 0.54  | -0.15 | -0.08 |
| AMST      | 0.34 | -0.11 | 0.04  | -0.46 | -0.72 | 0.28  | 0.24  | 0.04  | 0.02  |
| ROT       | 0.26 | 0.46  | -0.53 | -0.49 | 0.36  | -0.14 | 0.20  | 0.13  | -0.03 |
| Grade     | 0.38 | -0.28 | 0.05  | -0.02 | 0.36  | 0.37  | -0.11 | 0.07  | 0.70  |
| Robust    | 0.38 | -0.26 | 0.06  | -0.02 | 0.28  | 0.37  | -0.24 | 0.15  | -0.70 |
| Hypoxia   | 0.19 | 0.55  | 0.79  | -0.11 | 0.13  | -0.03 | 0.05  | 0.08  | 0.01  |
| Stem      | 0.32 | 0.33  | -0.20 | 0.67  | -0.09 | 0.31  | 0.41  | -0.18 | -0.03 |
| Intrinsic | 0.38 | 0.05  | -0.09 | 0.31  | -0.27 | -0.43 | -0.32 | 0.63  | 0.08  |
| WR        | 0.39 | 0.11  | -0.06 | -0.04 | -0.12 | -0.24 | -0.51 | -0.71 | 0.01  |

**Importance of components:**

|                        | PC1  | PC2  | PC3  | PC4  | PC5  | PC6  | PC7  | PC8  | PC9  |
|------------------------|------|------|------|------|------|------|------|------|------|
| Standard deviation     | 2.41 | 1.04 | 0.85 | 0.68 | 0.61 | 0.49 | 0.43 | 0.33 | 0.15 |
| Proportion of Variance | 0.64 | 0.12 | 0.08 | 0.05 | 0.04 | 0.03 | 0.02 | 0.01 | 0.00 |
| Cumulative Proportion  | 0.64 | 0.76 | 0.85 | 0.90 | 0.94 | 0.97 | 0.99 | 1.00 | 1.00 |

**Projected scores of test patients on PCs:**

|         | PC1   | PC2   | PC3   | PC4   | PC5   | PC6   | PC7   | PC8   | PC9   |
|---------|-------|-------|-------|-------|-------|-------|-------|-------|-------|
| ULL_002 | -0.51 | 0.51  | -0.59 | -0.11 | -0.07 | 0.58  | 0.25  | 0.36  | 0.22  |
| ULL_007 | -0.84 | -0.20 | -0.71 | -0.19 | 0.17  | 0.46  | -0.13 | -0.05 | -0.05 |
| ULL_011 | 2.46  | 1.23  | -0.78 | -0.56 | 0.20  | -0.12 | -0.21 | -0.28 | -0.02 |
| ULL_013 | -0.68 | 0.83  | -0.41 | 0.10  | -1.02 | -0.57 | 0.88  | 0.02  | -0.02 |
| ULL_014 | -0.94 | 0.49  | 0.89  | 0.15  | 0.29  | 0.18  | -0.36 | -0.23 | 0.03  |
| ULL_016 | -0.03 | 0.20  | -0.09 | 1.42  | 0.98  | 0.06  | 0.43  | -0.23 | -0.01 |
| ULL_019 | 0.76  | -0.19 | -1.53 | 1.11  | 0.44  | -0.10 | 0.60  | -0.84 | 0.32  |
| ULL_020 | -0.17 | 0.71  | -0.77 | -0.64 | 0.37  | -0.39 | -0.28 | 0.01  | -0.04 |
| ULL_022 | -0.94 | -0.62 | -0.93 | 0.98  | -0.12 | 0.33  | -0.19 | 0.20  | -0.13 |
| ULL_023 | 2.72  | -0.44 | 0.11  | -0.91 | 0.12  | -0.31 | 0.62  | -0.59 | -0.06 |
| ULL_024 | -0.76 | 0.36  | -0.93 | -1.07 | -1.08 | 0.39  | 0.44  | 0.06  | -0.02 |
| ULL_026 | 3.68  | 0.61  | -0.52 | -0.21 | 0.14  | -0.11 | 0.31  | 0.17  | 0.17  |
| ULL_027 | 0.28  | 0.72  | 0.28  | 0.66  | -0.76 | 0.50  | -0.22 | 0.17  | -0.08 |
| ULL_028 | -0.15 | -0.61 | -0.83 | 0.11  | -0.95 | 0.36  | 0.00  | 0.16  | -0.02 |
| ULL_031 | -1.08 | 2.19  | -0.14 | 1.40  | -0.68 | 0.43  | 0.69  | -0.27 | 0.07  |
| ULL_036 | -2.85 | -0.70 | 0.87  | -1.57 | 0.17  | 0.11  | 0.34  | -0.19 | -0.16 |
| ULL_037 | -3.27 | -1.28 | -0.65 | -0.13 | 0.31  | -0.21 | -0.15 | 0.30  | 0.21  |
| ULL_038 | 2.23  | -0.02 | 0.21  | 1.12  | -0.03 | 0.32  | -0.45 | 0.06  | 0.10  |
| ULL_044 | -1.65 | -2.66 | -0.43 | 0.40  | -0.30 | 1.09  | 0.01  | 0.31  | 0.02  |
| ULL_046 | -1.30 | 0.24  | 1.11  | -0.54 | 0.45  | 0.14  | 0.65  | 0.78  | -0.30 |
| ULL_048 | -1.35 | 0.20  | 0.45  | 0.59  | -0.49 | 0.06  | -0.03 | 0.42  | -0.28 |
| ULL_053 | 1.15  | -1.63 | 1.14  | 0.86  | 0.01  | -0.17 | 0.59  | 0.38  | -0.16 |
| ULL_055 | -3.52 | 0.86  | 0.02  | 0.08  | -0.33 | -0.81 | -0.47 | 0.19  | 0.05  |
| ULL_056 | 2.21  | 1.91  | 1.91  | -1.32 | 0.48  | 0.44  | -0.38 | -0.25 | -0.02 |
| ULL_057 | 3.55  | -0.20 | -0.71 | 0.26  | 0.67  | 0.19  | -0.69 | -0.04 | -0.10 |
| ULL_060 | -0.53 | 1.60  | -0.66 | 0.73  | 0.64  | -0.02 | -0.89 | -0.34 | -0.15 |
| ULL_062 | -3.91 | 1.31  | 0.78  | -0.84 | -0.41 | -0.23 | 0.38  | -0.59 | -0.06 |
| ULL_063 | -2.47 | -0.47 | -2.59 | 0.29  | 0.38  | -0.08 | -0.21 | 0.31  | -0.04 |
| ULL_065 | 5.74  | 1.50  | 0.86  | -0.26 | -0.78 | 0.66  | -0.26 | 0.04  | 0.15  |
| ULL_066 | 1.21  | 0.03  | 0.56  | 0.56  | -0.34 | 1.02  | 0.44  | -0.50 | 0.16  |
| ULL_067 | 0.24  | -2.36 | 0.56  | 0.74  | -0.34 | 0.60  | 0.12  | -0.22 | -0.07 |
| ULL_069 | 0.10  | -0.27 | 1.22  | -0.88 | 0.68  | 0.56  | -0.27 | 0.13  | 0.00  |

|             |       |       |       |       |       |       |       |       |       |
|-------------|-------|-------|-------|-------|-------|-------|-------|-------|-------|
| ULL_071     | 4.00  | -1.21 | -0.92 | 0.39  | 0.41  | -1.10 | 0.45  | -0.03 | -0.15 |
| ULL_072     | 1.16  | 0.02  | -0.27 | 0.24  | 0.21  | 0.18  | -0.28 | -0.39 | -0.01 |
| ULL_074     | -3.21 | 0.98  | -0.10 | 0.58  | -0.45 | 0.03  | -0.19 | -0.25 | -0.23 |
| ULL_075     | 0.89  | -1.42 | 1.15  | 0.60  | 0.28  | -0.47 | -0.30 | 0.21  | 0.15  |
| ULL_079     | -2.59 | 0.72  | -0.56 | 0.07  | -0.26 | 1.46  | -0.29 | -0.07 | -0.22 |
| ULL_080     | 3.34  | 0.93  | 0.42  | 0.47  | 1.27  | -0.31 | -0.03 | 0.10  | 0.22  |
| ULL_083     | 4.23  | -1.92 | -0.38 | -0.03 | -1.17 | -0.99 | -0.06 | -0.48 | -0.14 |
| ULL_085     | -0.57 | -0.49 | 0.18  | -0.02 | -0.77 | -0.13 | 0.36  | -0.07 | -0.09 |
| ULL_087     | 2.04  | 0.84  | 1.63  | 0.24  | 0.61  | -0.52 | 0.44  | -0.56 | -0.25 |
| ULL_088     | -0.69 | 1.58  | 0.75  | 0.69  | -0.26 | 0.44  | 0.72  | 0.62  | 0.00  |
| ULL_096     | 4.97  | -0.71 | 0.32  | -0.33 | -0.92 | -0.01 | 0.13  | 0.10  | -0.33 |
| ULL_097     | -2.57 | 0.47  | -0.28 | 0.31  | -0.30 | 0.32  | 0.45  | -0.21 | -0.18 |
| ULL_099     | 0.78  | -1.07 | 0.02  | 0.33  | 0.30  | 0.54  | 0.13  | 0.81  | 0.23  |
| ULL_101     | 2.79  | 0.45  | 0.30  | -0.24 | -0.82 | -0.34 | -0.58 | 0.22  | 0.36  |
| ULL_105     | 0.09  | -0.55 | 0.33  | -0.67 | -0.93 | -0.29 | 0.02  | 0.25  | -0.09 |
| ULL_107     | -0.98 | -0.17 | -0.67 | -0.58 | -0.84 | -0.08 | -0.55 | -0.26 | 0.09  |
| ULL_111     | -1.78 | -0.06 | 0.52  | -1.12 | 0.90  | 0.36  | -0.12 | -0.44 | -0.07 |
| ULL_112     | -3.14 | 1.32  | 0.06  | -1.15 | -0.23 | 0.20  | -0.55 | -0.01 | 0.19  |
| ULL_113     | 2.34  | 0.19  | -0.60 | 0.83  | 0.50  | 0.33  | -0.77 | -0.29 | 0.05  |
| ULL_122     | -0.48 | 0.92  | -1.01 | -0.44 | -0.23 | 0.15  | -0.33 | 0.16  | 0.01  |
| ULL_123     | 0.71  | -0.21 | -1.35 | -0.27 | -0.62 | 0.79  | 0.86  | -0.13 | 0.18  |
| ULL_132     | 2.06  | 1.22  | -0.15 | 0.52  | -0.57 | -0.64 | -0.99 | 0.11  | -0.07 |
| ULL_134     | -0.80 | 0.72  | -0.62 | -0.26 | -0.57 | -0.85 | 0.02  | 0.46  | -0.04 |
| ULL_135     | -1.53 | -0.74 | 0.55  | -0.22 | -0.33 | -0.60 | 0.16  | -0.31 | 0.09  |
| ULL_136     | -1.19 | 1.43  | 0.06  | 1.32  | -0.24 | 0.16  | 0.52  | -0.19 | 0.10  |
| ULL_138     | -2.30 | -1.91 | 1.85  | 0.16  | -0.12 | -0.06 | -0.27 | -0.23 | 0.18  |
| ULL_139     | 0.66  | 0.02  | 1.07  | -0.79 | 0.41  | 0.17  | 0.74  | -0.13 | 0.43  |
| ULL_143     | 1.32  | 0.27  | -0.01 | -0.54 | -0.22 | 0.12  | -0.36 | 0.38  | 0.19  |
| ULL_144     | -1.85 | 0.36  | -0.26 | -0.08 | -0.63 | -0.47 | -0.19 | -0.29 | 0.10  |
| ULL_150     | -2.26 | -0.77 | -0.55 | -0.90 | 0.36  | 0.21  | -0.05 | -0.42 | 0.03  |
| ULL_165     | 2.26  | -0.03 | -0.33 | 0.35  | -0.43 | 0.90  | 0.07  | -0.57 | -0.15 |
| ULL_167     | 2.99  | 0.56  | -1.05 | -0.68 | 1.86  | -0.24 | 0.46  | 0.21  | -0.20 |
| ULL_168     | -2.85 | 0.19  | -1.32 | -0.71 | 0.38  | -0.25 | 0.15  | -0.08 | -0.10 |
| ULL_169     | 3.03  | -0.13 | 0.19  | 1.05  | -0.02 | -1.08 | 0.36  | -0.02 | -0.01 |
| ULL_176     | -3.64 | 0.18  | -0.92 | -0.55 | 0.76  | -1.04 | -0.17 | 0.41  | -0.15 |
| ULL_177     | 4.94  | -0.14 | 0.85  | 0.34  | 0.08  | 0.56  | -0.48 | 0.30  | -0.20 |
| ULL_181     | -0.03 | 1.99  | 0.34  | -0.48 | -0.62 | -0.71 | 0.22  | 0.44  | 0.12  |
| ULL_183     | -0.45 | -2.15 | 0.17  | 0.05  | 0.03  | -0.43 | -0.74 | 0.02  | 0.09  |
| ULL_184     | 1.63  | 0.35  | 0.94  | -0.05 | -0.33 | -0.44 | -0.12 | -0.19 | -0.01 |
| ULL_188     | 3.39  | -1.33 | -2.04 | -1.05 | 0.87  | 0.25  | 0.35  | -0.20 | 0.09  |
| ULL_190     | -2.38 | -1.89 | 0.66  | 0.14  | 0.11  | 0.23  | -0.14 | -0.28 | 0.03  |
| ULL_199     | -3.17 | -1.18 | 0.66  | -0.01 | 0.44  | -0.24 | 0.04  | 0.05  | 0.08  |
| ULL_201     | -1.12 | 0.51  | 0.52  | 0.29  | 1.30  | 0.30  | 0.64  | 0.18  | 0.11  |
| ULL_202     | 1.10  | 0.24  | 0.95  | -0.17 | 0.42  | -0.09 | 0.39  | 0.32  | 0.12  |
| ULL_214     | -0.94 | -0.54 | -0.16 | 0.17  | 0.35  | -0.19 | 0.24  | 0.65  | -0.09 |
| ULL_216     | -0.68 | 0.45  | -1.01 | -0.13 | 0.17  | -0.26 | -0.33 | 0.36  | 0.06  |
| ULL_222     | -3.31 | -1.38 | 0.72  | -0.33 | -0.09 | -0.14 | -0.19 | -0.19 | -0.07 |
| ULL_230     | 1.14  | -1.34 | 0.60  | -0.50 | -0.89 | -0.04 | -0.12 | 0.01  | 0.11  |
| DNR_N_A0100 | -6.72 | 0.57  | 1.06  | 1.76  | 0.71  | -0.49 | -0.33 | -0.23 | 0.08  |
