# Supplementary material for: Combining Gene Signatures Improves Prediction of Breast Cancer Survival
Source: PubMed Central journal article supplement (PMC3053398; doi:10.1371/journal.pone.0017845), 2011-03-10
Supplement: pone.0017845.s008.pdf [file pone.0017845.s008.pdf]

**Table S2. Results summary of univariate and multivariate analysis of combined PI-risk predictor for systemic recurrence**

**1. Univariate analysis**

**Univariate Cox model incorporating the dichotomized combined-PI as predictor**

```
coxph(formula = Surv(time, event == 1) ~ combined_PI, data = tmp)
```

```
n= 77, number of events= 34
(4 observations deleted due to missingness)
```

```

              coef exp(coef) se(coef)      z Pr(>|z|)
combined_PI:high risk 1.0365    2.8194  0.3678 2.819  0.00482 **
---
Signif. codes:  0 '***' 0.001 '**' 0.01 '*' 0.05 '.' 0.1 ' ' 1

              exp(coef) exp(-coef) lower .95 upper .95
combined_PI:high risk    2.819    0.3547    1.371    5.797
```

```

Rsquare= 0.106 (max possible= 0.971 )
Likelihood ratio test= 8.61 on 1 df,  p=0.003341
Wald test              = 7.94 on 1 df,  p=0.004824
Score (Logrank) test = 8.67 on 1 df,  p=0.003242
```

**Test proportional hazards assumption for individual univariate Cox models reported in the univariate comparison part**

```

$combined_PI
              rho chisq  p
combined_PI:high risk -0.0483 0.0781 0.78
$tumorSize
              rho chisq  p
tumorSizepT2  -0.15344 0.77843 0.378
tumorSizepT3-pT4  0.00864 0.00253 0.960
GLOBAL          NA 2.10350 0.349
$histoGrade
              rho chisq  p
histoGrade2  0.210  1.50 0.220
histoGrade3  0.204  1.42 0.233
GLOBAL          NA  1.53 0.465
$TP53
              rho chisq  p
TP53mutation -0.144 0.661 0.416
$node
              rho chisq  p
nodepN1      -0.0746 0.1871 0.665
nodepN2-pN3  -0.0398 0.0523 0.819
nodeOther    -0.2007 1.2908 0.256
GLOBAL          NA 1.3267 0.723
$ER
              rho chisq  p
ERpositive  0.475  6.85 0.00887
$stage
              rho chisq  p
stage2     -0.11936 0.39224 0.531
stage3     -0.13508 0.49363 0.482
```

```

stage4 -0.00722 0.00143 0.970
GLOBAL      NA 1.11034 0.775
$AOL_risk
      rho chisq  p
AOL_risk -0.0275 0.0201 0.887
$RS
      rho chisq  p
RS1 -0.00289 0.000281 0.987
$AMST
      rho chisq  p
AMST1 -0.0502 0.0836 0.772
$ROT
      rho chisq  p
ROT1 -0.239 1.87 0.172
$Grade
      rho chisq  p
Grade1 -0.0475 0.0746 0.785
$Robust
      rho chisq  p
Robust1 -0.065 0.139 0.709
$Hypoxia
      rho chisq  p
Hypoxia1 -0.354 4.18 0.0409
$Stem
      rho chisq  p
Stem1 -0.0384 0.0491 0.825
$Intrinsic
      rho chisq  p
Intrinsic1 0.174 1.02 0.312
$WR
      rho chisq  p
WR1 0.0921 0.286 0.593

```

### ***Summary of univariate comparison***

|             | Deviance | PVE   | p     | Cindex | HR    | HR_lowerCI | HR_upperCI |          | type      |
|-------------|----------|-------|-------|--------|-------|------------|------------|----------|-----------|
| combined_PI | 8.611    | 0.106 | 0.003 | 0.746  | 2.819 | 1.371      | 5.797      | GeneSet  | predictor |
| AOL_risk    | 2.283    | 0.033 | 0.131 | 0.734  | 2.629 | 0.622      | 11.106     | Clinical | parameter |
| TP53        | 7.470    | 0.092 | 0.006 | 0.759  | 2.872 | 1.415      | 5.830      | Clinical | parameter |
| tumorSize   | 9.358    | 0.117 | 0.009 | 0.706  | NA    | NA         | NA         | Clinical | parameter |
| stage       | 7.501    | 0.111 | 0.058 | 0.698  | NA    | NA         | NA         | Clinical | parameter |
| node        | 6.090    | 0.076 | 0.107 | 0.605  | NA    | NA         | NA         | Clinical | parameter |
| ER          | 0.227    | 0.003 | 0.634 | 0.403  | 0.838 | 0.406      | 1.727      | Clinical | parameter |
| histoGrade  | 1.979    | 0.025 | 0.372 | 0.480  | NA    | NA         | NA         | Clinical | parameter |
| RS          | 4.827    | 0.061 | 0.028 | 0.686  | 2.146 | 1.072      | 4.296      | GeneSet  | predictor |
| AMST        | 2.092    | 0.027 | 0.148 | 0.630  | 1.646 | 0.838      | 3.232      | GeneSet  | predictor |
| ROT         | 3.591    | 0.046 | 0.058 | 0.686  | 1.933 | 0.966      | 3.865      | GeneSet  | predictor |
| Grade       | 6.174    | 0.077 | 0.013 | 0.712  | 2.377 | 1.185      | 4.767      | GeneSet  | predictor |
| Robust      | 5.391    | 0.068 | 0.020 | 0.703  | 2.257 | 1.114      | 4.573      | GeneSet  | predictor |
| Hypoxia     | 1.060    | 0.014 | 0.303 | 0.626  | 1.426 | 0.727      | 2.795      | GeneSet  | predictor |
| Stem        | 0.115    | 0.001 | 0.734 | 0.535  | 1.124 | 0.573      | 2.205      | GeneSet  | predictor |
| Intrinsic   | 0.437    | 0.006 | 0.508 | 0.538  | 1.261 | 0.631      | 2.519      | GeneSet  | predictor |
| WR          | 3.093    | 0.039 | 0.079 | 0.640  | 1.835 | 0.926      | 3.636      | GeneSet  | predictor |

## 2. Multivariate analysis

### Correlation between TP53 & combined-PI predictor

|     | low risk | high risk |
|-----|----------|-----------|
| WT  | 38       | 22        |
| Mut | 2        | 18        |

Fisher's Exact Test for Count Data  
p-value = 5.308e-05  
alternative hypothesis: true odds ratio is not equal to 1  
95 percent confidence interval:  
3.137077 145.691741  
sample estimates:  
odds ratio  
15.026

### Full model: Risk = tumor size + Tp53 + combined\_PI + strata(ER)

|                       | coef  | exp(coef) | se(coef) | z    | p     |
|-----------------------|-------|-----------|----------|------|-------|
| tumorSize:pT2         | 1.005 | 2.73      | 0.575    | 1.75 | 0.080 |
| tumorSize:pT3-pT4     | 1.200 | 3.32      | 0.658    | 1.82 | 0.068 |
| TP53:mutation         | 0.732 | 2.08      | 0.575    | 1.27 | 0.200 |
| combined_PI:high risk | 0.974 | 2.65      | 0.468    | 2.08 | 0.037 |

Likelihood ratio test=16.1 on 4 df, p=0.00296 n= 68, number of events= 31 (13 observations deleted due to missingness)

### Model 2: Risk = tumor size + Tp53 + strata(ER)

|                   | coef | exp(coef) | se(coef) | z    | p     |
|-------------------|------|-----------|----------|------|-------|
| tumorSize:pT2     | 1.14 | 3.14      | 0.576    | 1.98 | 0.047 |
| tumorSize:pT3-pT4 | 1.43 | 4.17      | 0.660    | 2.16 | 0.030 |
| TP53:mutation     | 1.33 | 3.79      | 0.519    | 2.57 | 0.010 |

Likelihood ratio test=11.8 on 3 df, p=0.00793 n= 68, number of events= 31 (13 observations deleted due to missingness)

### Model comparison by AIC and Analysis of Deviance: Full model vs Model 2

```
> stepAIC(model_full)
Start: AIC=191.8
Surv(time, event == 1) ~ tumorSize + TP53 + combined_PI + strata(ER)

> stepAIC(model2)
Start: AIC=194.01
Surv(time, event == 1) ~ tumorSize + TP53 + strata(ER)
```

### Analysis of Deviance Table

```
Cox model: response is Surv(time, event == 1)
Model 1: ~ tumorSize + TP53 + combined_PI + strata(ER)
Model 2: ~ tumorSize + TP53 + strata(ER)
loglik Chisq Df P(>|Chi|)
1 -91.902
2 -94.003 4.2011 1 0.0404 *
---
Signif. codes: 0 '***' 0.001 '**' 0.01 '*' 0.05 '.' 0.1 ' ' 1
```

### Model selection by AIC:

```
stepAIC(model_full, direction = "both")
Start: AIC=191.8
Surv(time, event == 1) ~ tumorSize + TP53 + combined_PI + strata(ER)
      Df  AIC
- TP53    1 191.46
<none>    191.80
- tumorSize  2 192.25
- combined_PI  1 194.01

Step: AIC=191.46
Surv(time, event == 1) ~ tumorSize + combined_PI + strata(ER)
      Df  AIC
<none>    191.46
- tumorSize  2 191.51
+ TP53    1 191.80
- combined_PI  1 198.66
Call:
coxph(formula = Surv(time, event == 1) ~ tumorSize + combined_PI + strata(ER), data = tmp)
```

|                       | coef  | exp(coef) | se(coef) | z    | p      |
|-----------------------|-------|-----------|----------|------|--------|
| tumorSize:pT2         | 0.952 | 2.59      | 0.563    | 1.69 | 0.0910 |
| tumorSize:pT3-pT4     | 1.090 | 2.97      | 0.640    | 1.70 | 0.0890 |
| combined_PI:high risk | 1.206 | 3.34      | 0.413    | 2.92 | 0.0035 |

Likelihood ratio test=14.4 on 3 df, p=0.00241 n= 68, number of events= 31

### Final model: Risk = tumor size + combined\_PI + strata(ER)

n= 68, number of events= 31 (13 observations deleted due to missingness)

|                       | coef   | exp(coef) | se(coef) | z     | Pr(> z )   |
|-----------------------|--------|-----------|----------|-------|------------|
| tumorSize:pT2         | 0.9524 | 2.5920    | 0.5628   | 1.692 | 0.09059 .  |
| tumorSize:pT3-pT4     | 1.0897 | 2.9734    | 0.6398   | 1.703 | 0.08853 .  |
| combined_PI:high risk | 1.2060 | 3.3402    | 0.4132   | 2.919 | 0.00351 ** |

---  
Signif. codes: 0 '\*\*\*' 0.001 '\*\*' 0.01 '\*' 0.05 '.' 0.1 ' ' 1

|                       | exp(coef) | exp(-coef) | lower .95 | upper .95 |
|-----------------------|-----------|------------|-----------|-----------|
| tumorSize:pT2         | 2.592     | 0.3858     | 0.8602    | 7.811     |
| tumorSize:pT3-pT4     | 2.973     | 0.3363     | 0.8485    | 10.420    |
| combined_PI:high risk | 3.340     | 0.2994     | 1.4862    | 7.507     |

Rsquare= 0.191 (max possible= 0.947)  
Likelihood ratio test= 14.39 on 3 df, p=0.002415  
Wald test = 12.9 on 3 df, p=0.004867  
Score (logrank) test = 14.57 on 3 df, p=0.002222

### Test proportional hazards assumption for Final model

|                       | rho     | chisq  | p     |
|-----------------------|---------|--------|-------|
| tumorSize:pT2         | -0.0402 | 0.0477 | 0.827 |
| tumorSize:pT3-pT4     | 0.0378  | 0.0389 | 0.844 |
| combined_PI:high risk | 0.1143  | 0.4301 | 0.512 |
| GLOBAL                | NA      | 0.7959 | 0.850 |
