# Supplementary material for: Combining Gene Signatures Improves Prediction of Breast Cancer Survival
Source: PubMed Central journal article supplement (PMC3053398; doi:10.1371/journal.pone.0017845), 2011-03-10
Supplement: pone.0017845.s009.pdf [file pone.0017845.s009.pdf]

**Table S3. Molecular and clinicopathological characteristics of the tumor material in MicMa and Ull datasets.**

| <i>Characteristics</i> |                            | MicMa |                | Ull |                |
|------------------------|----------------------------|-------|----------------|-----|----------------|
|                        |                            | n     | % <sup>§</sup> | n   | % <sup>§</sup> |
| All                    |                            | 123   | 100            | 80* | 100            |
| Molecular subtype      | Luminal A                  | 50    | 40.7           | 23  | 28.8           |
|                        | Luminal B                  | 16    | 13.0           | 15  | 18.8           |
|                        | ERBB2+                     | 21    | 17.1           | 10  | 12.5           |
|                        | Basal-like                 | 17    | 13.8           | 12  | 15.0           |
|                        | Normal-like                | 15    | 12.2           | 20  | 25.0           |
|                        | Unclassified               | 4     | 3.3            |     |                |
| TP53                   | Mutant                     | 38    | 32.5           | 20  | 25.0           |
|                        | Wild type                  | 79    | 67.5           | 60  | 75.0           |
|                        | Missing                    | 6     |                |     |                |
| Estrogen receptor      | Positive                   | 80    | 66.1           | 45  | 62.5           |
|                        | Negative                   | 41    | 33.9           | 27  | 37.5           |
|                        | Missing                    | 2     |                | 8   |                |
| Histological Grade     | I                          | 16    | 13.2           | 6   | 7.5            |
|                        | II                         | 58    | 47.9           | 53  | 66.3           |
|                        | III                        | 47    | 38.8           | 21  | 26.3           |
|                        | Missing                    | 2     |                |     |                |
| Tumor status           | pT1 ( $\leq 2$ cm)         | 55    | 44.7           | 20  | 26.0           |
|                        | pT2 ( $> 2 \leq 5$ cm)     | 51    | 41.5           | 44  | 57.1           |
|                        | pT3-4 ( $> 5$ cm)          | 13    | 10.6           | 14  | 18.2           |
|                        | pTX <sup>α</sup>           | 3     | 2.4            | 2   |                |
| Nodal status           | pN0 (Negative)             | 50    | 40.7           | 33  | 41.3           |
|                        | pN1 (1-3 positive)         | 35    | 28.5           | 23  | 28.8           |
|                        | pN2-3 ( $\geq 4$ positive) | 31    | 17.1           | 12  | 15.0           |
|                        | pNX <sup>#</sup>           | 7     | 5.7            | 12  | 15.0           |
| Systemic relapse       | Yes                        | 39    | 32.5           | 34  | 44.2           |
|                        | No                         | 81    | 67.5           | 43  | 55.8           |
|                        | Missing                    | 3     |                | 3   |                |
| Death                  | From breast cancer         | 34    | 27.6           | 30  | 39.0           |
|                        | Other cause                | 21    | 17.1           | 20  | 26.0           |
|                        | No                         | 68    | 55.3           | 25  | 32.5           |
|                        | Emmigrated                 |       |                | 2   | 2.6            |
|                        | Missing                    |       |                | 3   |                |

For all parameters, numbers are calculated excluding missing data<sup>§</sup>.

<sup>§</sup>Missing includes both non-evaluable cases, not performed and information not available.

\* Ull cohort (n = 81) contains 80 tumor samples and one additional healthy tissue, which was excluded from the calculation.

<sup>α</sup> pTX defines those cases where no determination of tumor size was possible.

<sup>#</sup> pNX defines those cases where no axillary dissection was performed but no clinical sign of nodal metastasis existed.
